# Supplementary material for: Multi-stimuli responsive smart elastomeric hyperbranched polyurethane/reduced graphene oxide nanocomposites
Source: Royal Society of Chemistry journal article supplement (doi:10.1039/c4ta02497d), 2014-01-01
Supplement: c4ta02497d1.pdf [file c4ta02497d1.pdf]

## Supporting Information

### **Multi-stimuli responsive smart elastomeric hyperbranched polyurethane/ reduced graphene oxide nanocomposites**

*Suman Thakur, Niranjan Karak\**

Advanced Polymer and Nanomaterial Laboratory, Department of Chemical Sciences, Tezpur  
University, Tezpur 784028, India.

Tel: +91 3712-267327;

Email address: [nkarak@tezu.ernet.in](mailto:nkarak@tezu.ernet.in) (N. Karak)

$$E_{NC} = E_P \left[ \frac{3}{8} \frac{1 + \eta_L \zeta V_C}{1 - \eta_L V_C} + \frac{5}{8} \frac{1 + 2\eta_T V_C}{1 - \eta_T V_C} \right] \quad (1)$$

$$E_{\parallel} = E_P \left[ \frac{1 + \eta_L \zeta V_C}{1 - \eta_L V_C} \right] \quad (2)$$

$$\eta_L = \frac{(E_{RGO}/E_P) - 1}{(E_{RGO}/E_P) + \zeta} \quad (3)$$

$$\eta_T = \frac{(E_{GO}/E_P) - 1}{(E_{GO}/E_P) + 2} \quad (4)$$

Where  $E_P$ ,  $E_{RGO}$ ,  $E_{NC}$  and  $E_{\parallel}$ , are young's modulus of HBPU, RGO, nanocomposites with randomly distributed RGO and aligned parallel to the surface of the sample, respectively.  $\zeta$  and  $V_C$  are diameter to thickness ratio and volume fraction of RGO, respectively. The parameters implemented in the calculation are determined as follows.<sup>1,2</sup>

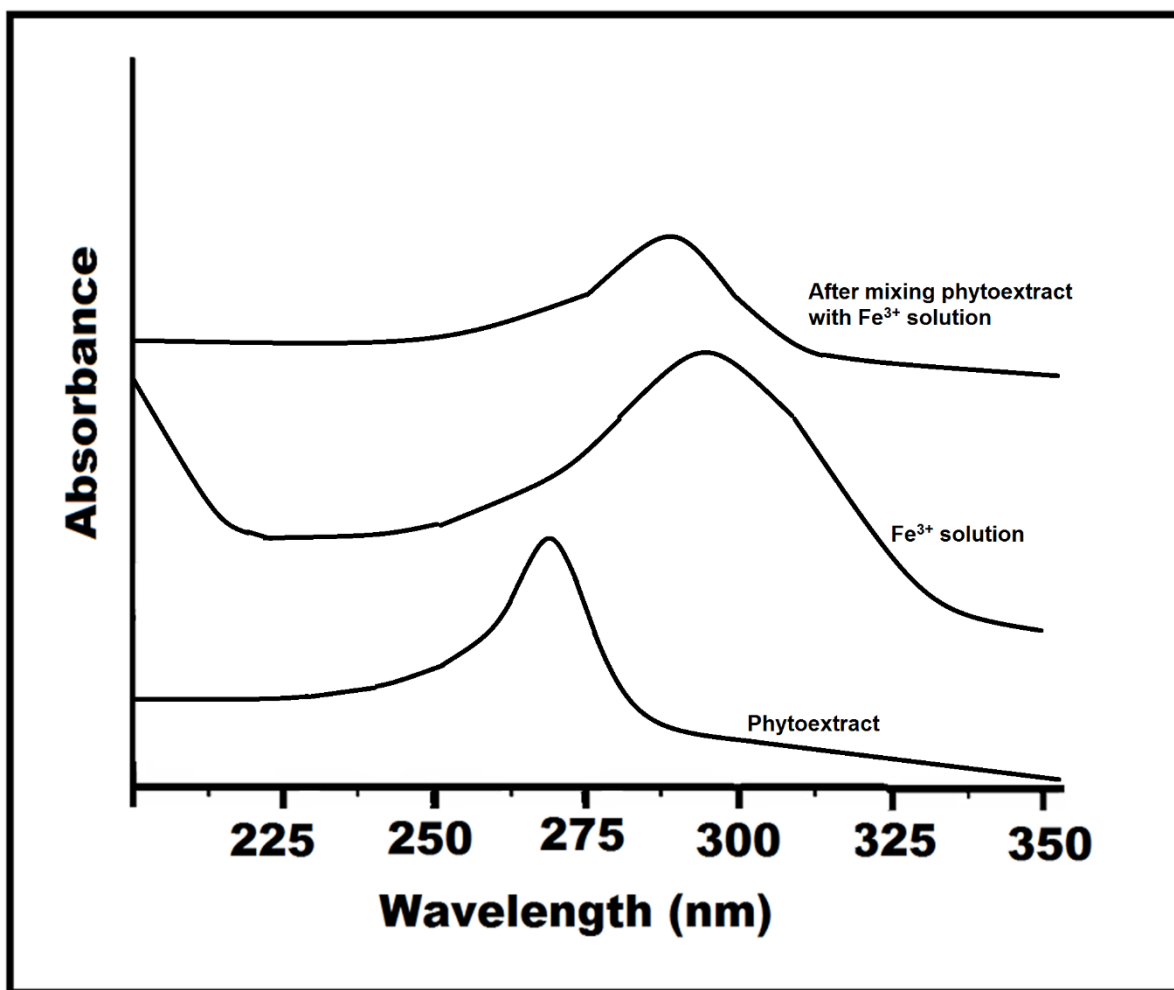

Fig. S1 UV-visible spectra of aqueous phytoextract, Fe<sup>3+</sup> solution and their complex.

Table S1 Crystallinity of HPU and HPU/ RGO nanocomposites

| Sample     | T <sub>m</sub> (°C) | Crystallinity (%) |
|------------|---------------------|-------------------|
| HPU        | 48.3                | 26.60             |
| HPU/RGO0.5 | 50.3                | 29.25             |
| HPU/RGO1.5 | 51.2                | 33.56             |
| HPU/RGO2.5 | 52.7                | 34.39             |

#### Reference

1. J. J. Liang, Y. Huang, L. Zhang, Y. Wang, Y. F. Ma, T. Y. Guo and Y. S. Chen, *Adv. Funct. Mater.* 2009, **19**, 2297.
2. C. Gomez-Navarro, M. Burghard and K. Kern, *Nano Lett.*, 2008, **8**, 2045.
